# Supplementary material for: Building Sector Issues in about 100 Years: End-Of-Life Scenarios of Carbon-Reinforced Concrete Presented in the Context of a Life Cycle Assessment, Focusing the Carbon Footprint
Source: MDPI journal article supplement (doi:10.3390/pr10091791), 2022-09-05
Supplement: s1 [file s1]

Archive with 1 entries (1 files):
- processes-1871275-supplementary.pdf
